# Supplementary material
Source: PubMed Central journal article supplement (PMC9724659)
Supplement: EMBR-23-e54685-s004.pdf [file EMBR-23-e54685-s004.pdf]

## Expanded View Figures

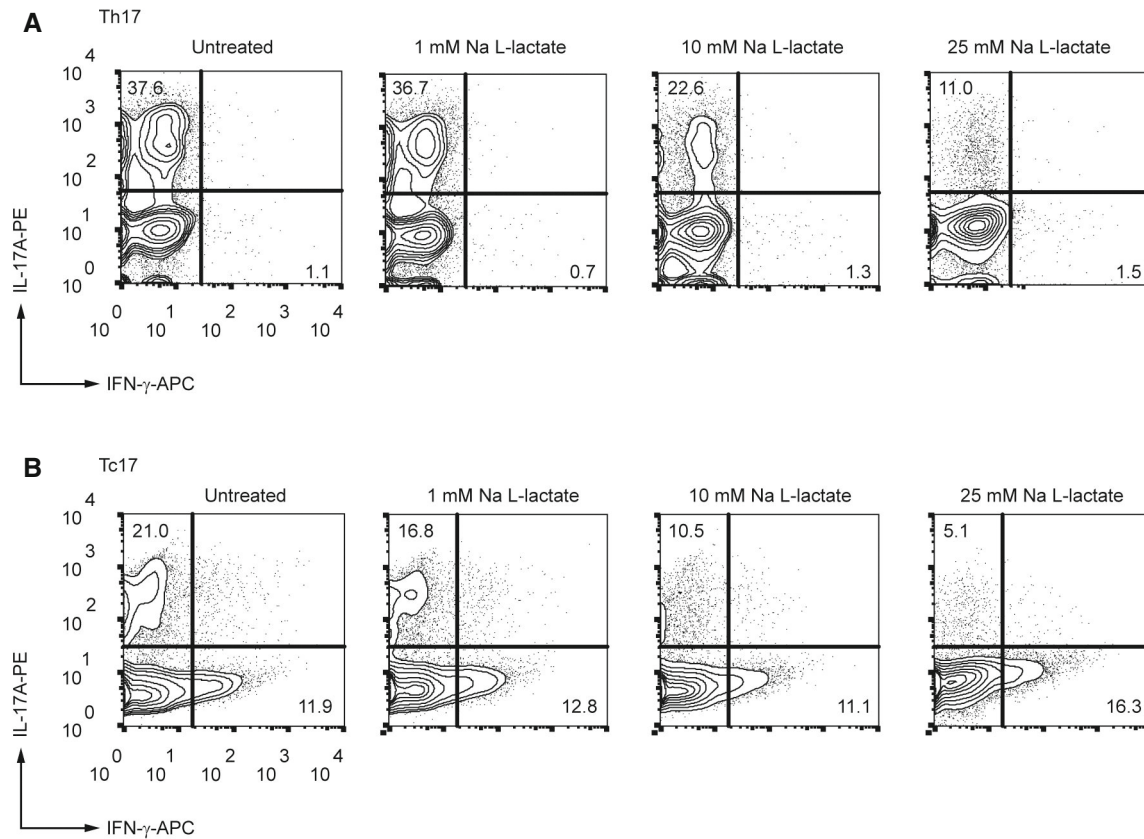

**Figure EV1. Lactate suppresses production of IL-17A in T cells.**

A, B CD4<sup>+</sup> (A) and CD8<sup>+</sup> (B) T lymphocytes were purified from spleens and LN of WT mice and differentiated under Th17-polarizing conditions for 3 days in the presence of increasing lactate concentrations, respectively. Representative contour plots indicate the percentage of IL-17A<sup>+</sup> and IFN-γ<sup>+</sup> cells, detected by flow cytometry ( $n = 3$  biological replicates).

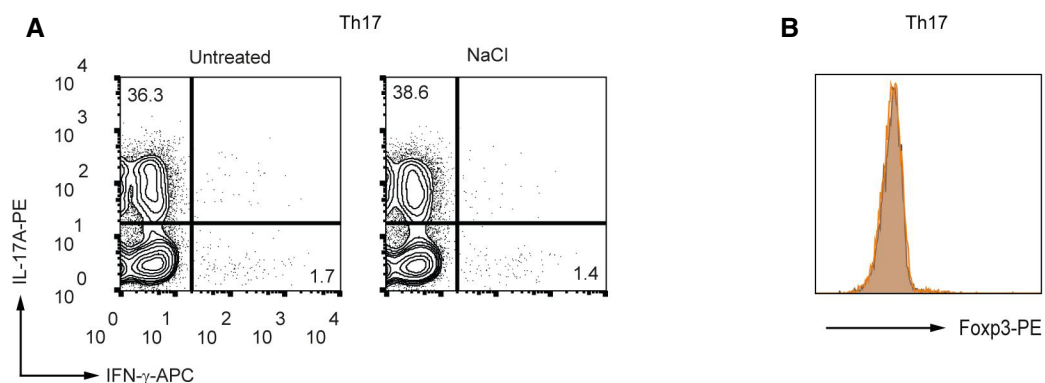

**Figure EV2. Effect of NaCl on differentiation of Th17 cells.**

A, B Murine CD4<sup>+</sup> T cells were cultured under Th17-inducing conditions in the presence or absence of NaCl (25 mM) for 3 days. The percentages of IL-17A<sup>+</sup> cells (A) and Foxp3 expression (B) were determined by flow cytometry ( $n = 3$  biological replicates).

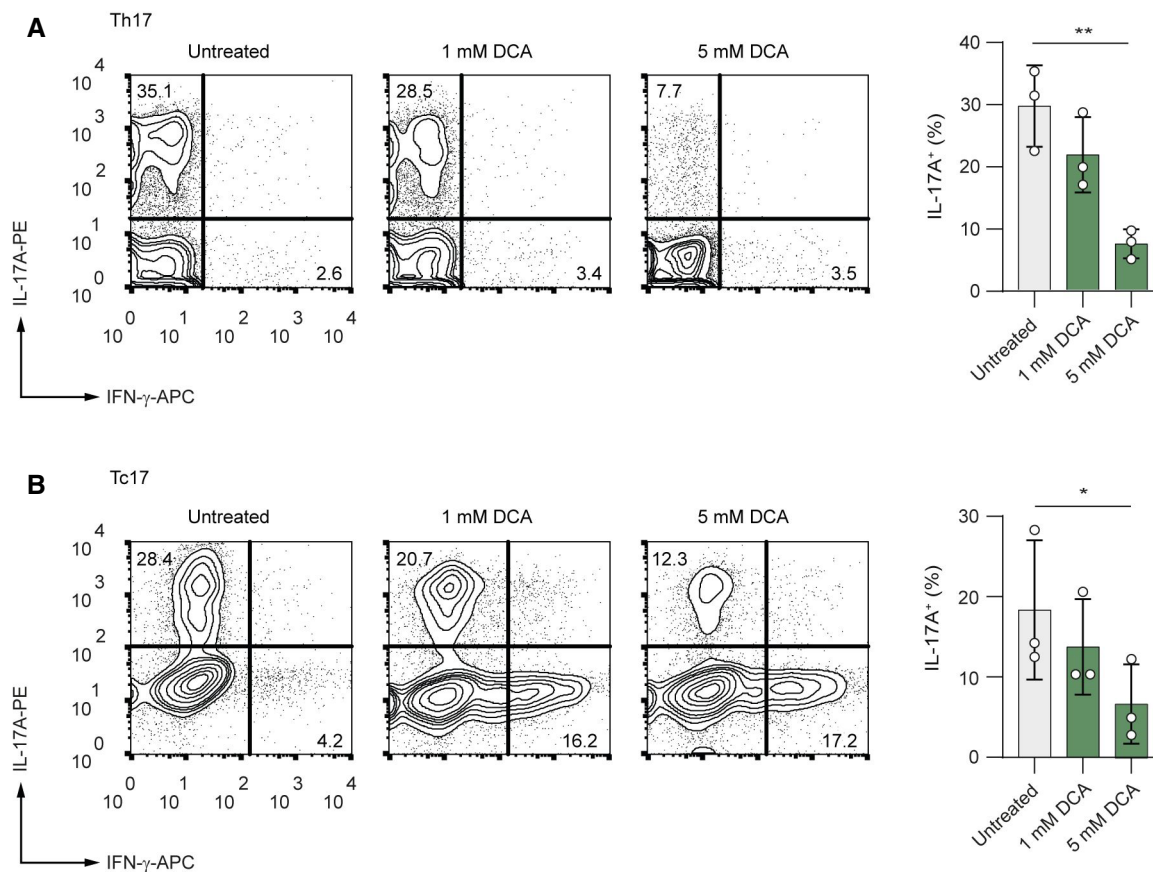

**Figure EV3. DCA suppresses production of IL-17A in Th17 and Tc17 cells.**

A, B CD4<sup>+</sup> (A) and CD8<sup>+</sup> (B) T cells were isolated from spleens and LNs of WT mice. Purified T cells were polarized under Th17-inducing conditions and treated with increasing concentrations of DCA for 3 days. Representative contour plots show the frequencies of IL-17A<sup>+</sup> and IFN- $\gamma$ <sup>+</sup> cells analyzed by flow cytometry ( $n = 3$  biological replicates; n.s., not significant; \* $P = 0.01$ – $0.05$ ; \*\* $P = 0.001$ – $0.01$ ; data are analyzed by the two-tailed unpaired Student's  $t$ -test).

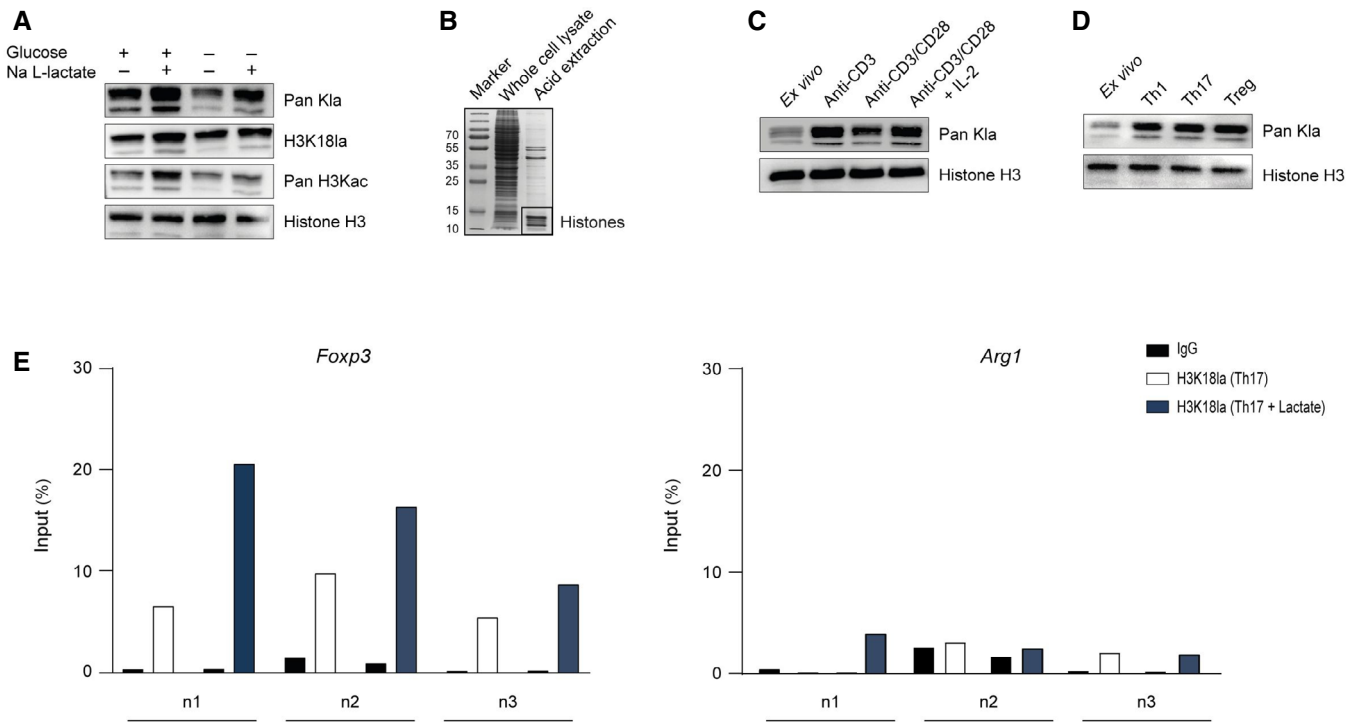

**Figure EV4. Histone lactylation in CD4<sup>+</sup> T cells.**

- A Global histone (Kla) and specific H3K18 lactylation were analyzed by immunoblotting 24 h after stimulation of nonpolarized macrophages. Bone marrow-derived macrophages were cultured in the presence or absence of 25 mM glucose and 25 mM Na L-lactate. Immunoblotting of representative whole-cell extracts is shown ( $n = 3$  biological replicates).
- B Histone preparation by acid extraction from the whole-cell lysate of murine CD4<sup>+</sup> T cells, visualized by Coomassie blue staining.
- C Western blots of acid-extracted histones from activated CD4<sup>+</sup> T cells showing global histone lactylation in the presence of glucose (25 mM) at 24 h after stimulation of cells. One of three similar experiments is shown.
- D Immunoblotting of acid-extracted lactylated histones from differentiated Th1, Th17, and Treg cells on day 3 of differentiation. As control lymphocytes, *ex vivo* purified, nonactivated CD4<sup>+</sup> T cells were used.
- E ChIP analysis of H3K18-lactylated histones at the *Arg1* and *Foxp3* promoter regions in the absence or presence of extracellular lactate (25 mM) was performed after 24 h of the cell culture for Th17 cells. Three independent experiment ( $n = 3$  biological replicates) are shown (n1, n2, n3).

Source data are available online for this figure.

**Figure EV5. Gating strategy for detection of Th17 cells.**

Gating strategy used for flow cytometry analysis of Th17 cells. The purity of CD4<sup>+</sup> T cells, as well as IL-17A frequency and *Foxp3* expression, is displayed.

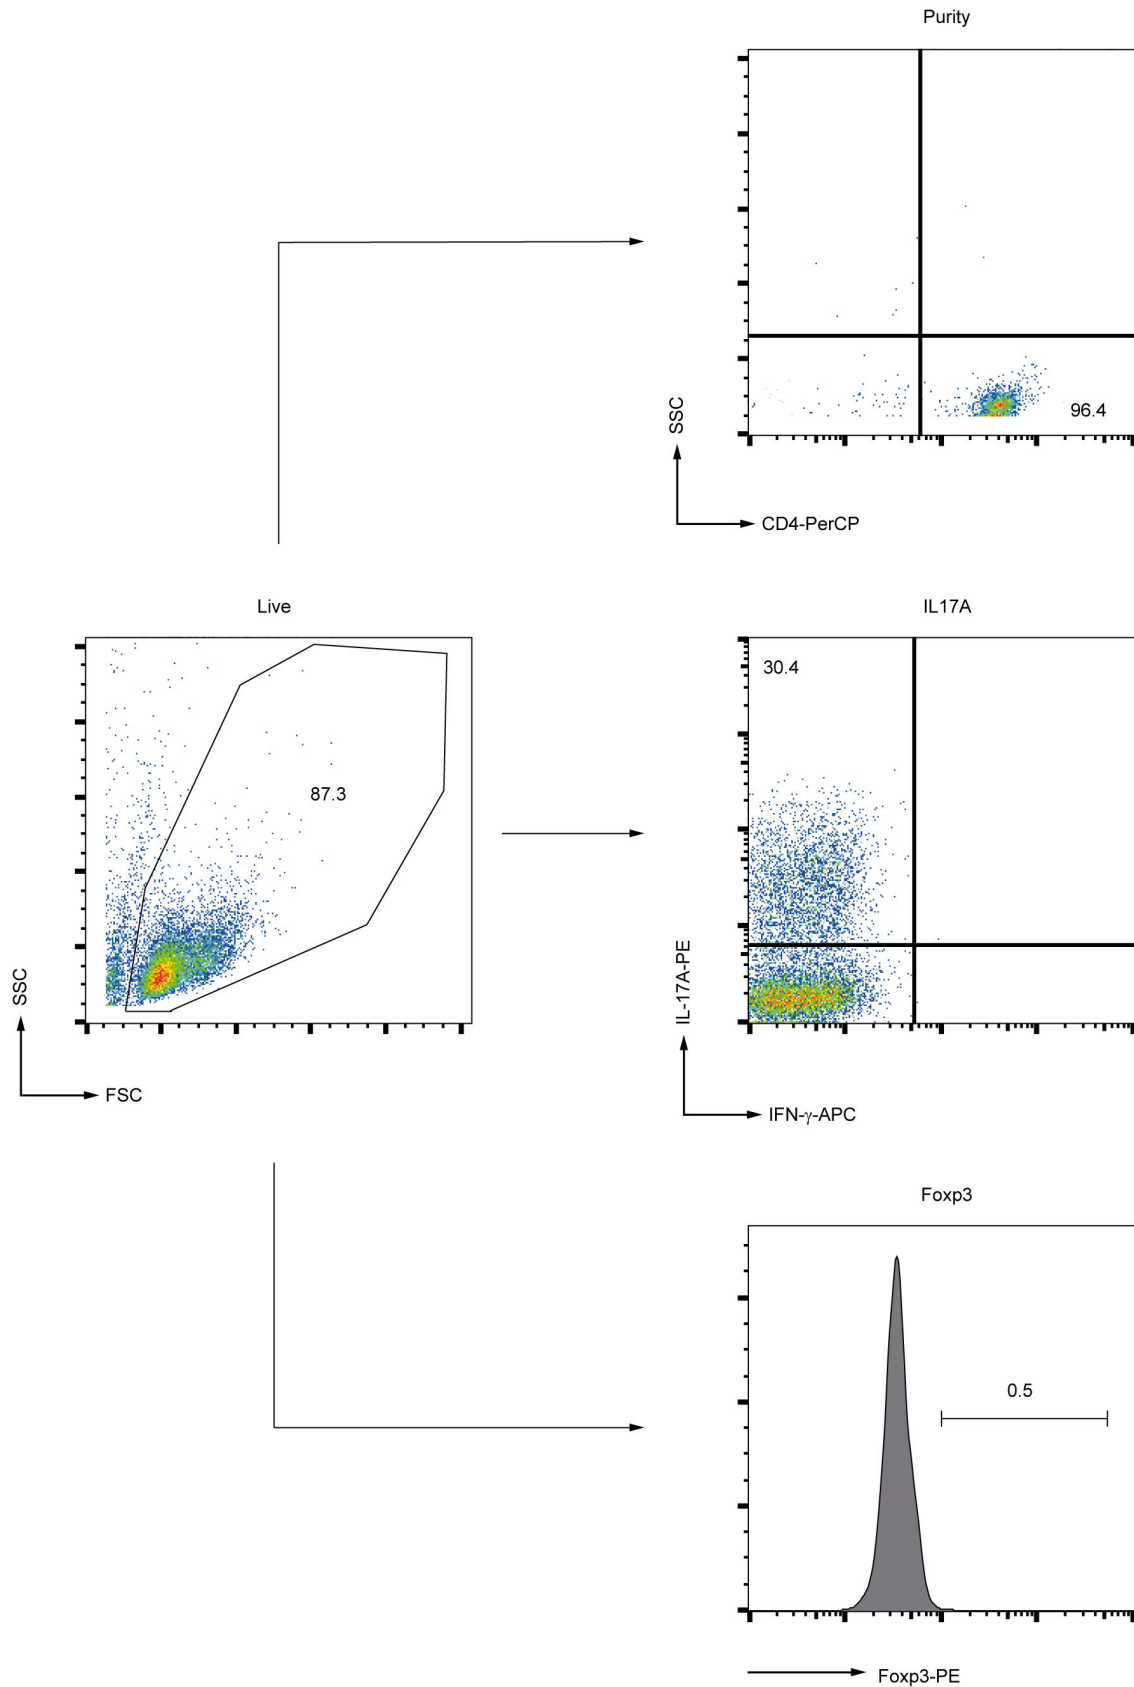

Figure EV5.
